# Supplementary material
Source: publisher site journal article supplement (https://www.dovepress.com/get_supplementary_file.php?f=415318.docx)
Supplement: Supplementary file 1 [file get_supplementary_file.php]

**Supplementary Figure legends**

**
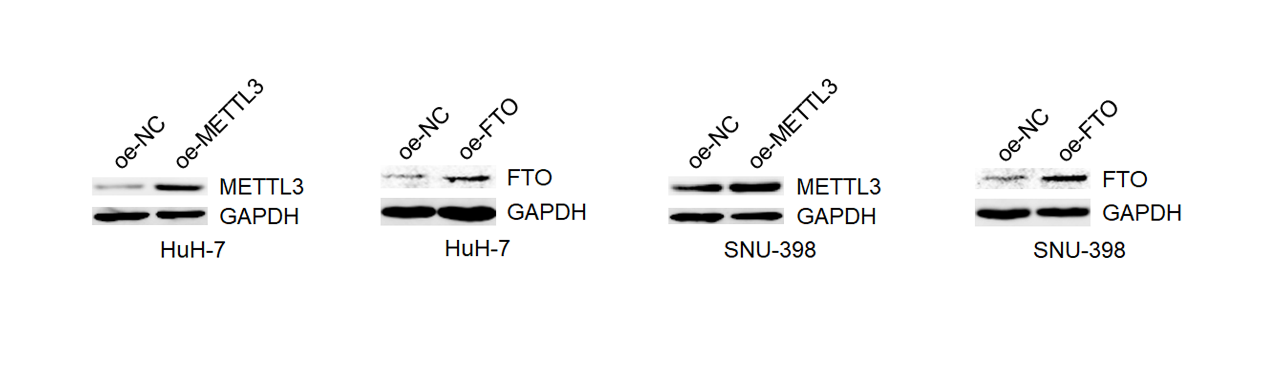
**

**Figure S1.** Overexpression efficiencies of METTL3 and FTO in HCC cells. METTL3 and FTO protein expression levels in HuH-7 and SNU-398 cells with METTL3 or FTO overexpression was measured by western blot.


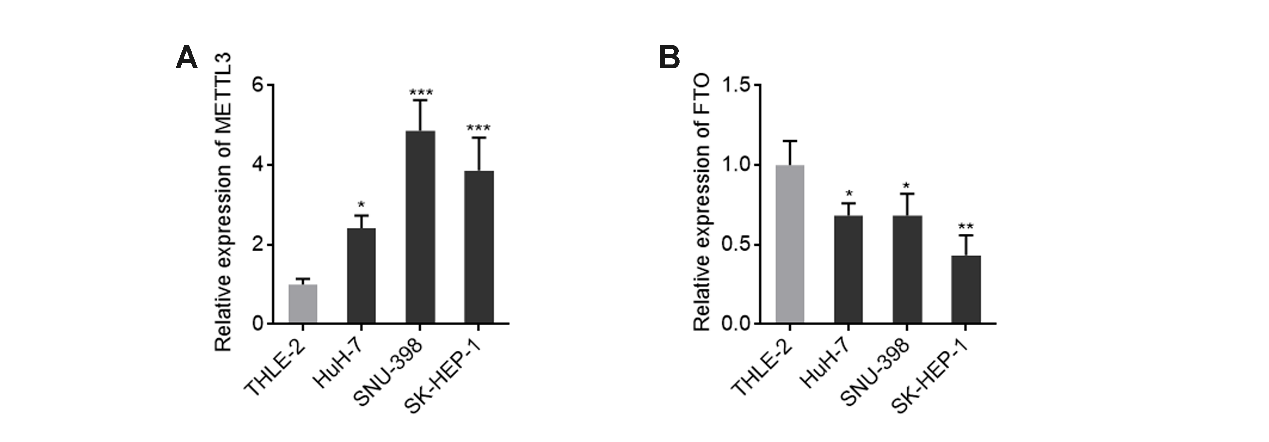


**Figure S2.** METTL3 is increased and while FTO is decreased in HCC cell lines. **(A)** METTL3 expression in immortalized liver cell line THLE-2 and HCC cell lines HuH-7, SNU-398, and SK-HEP-1 was detected by qPCR. **(B)** FTO expression in immortalized liver cell line THLE-2 and HCC cell lines HuH-7, SNU-398, and SK-HEP-1 was detected by qPCR. Results are presented as mean ± SD based on three independent experiments. **P* < 0.05, ***P* < 0.01, ****P* < 0.001 by one-way ANOVA followed by Dunnett's multiple comparisons test.


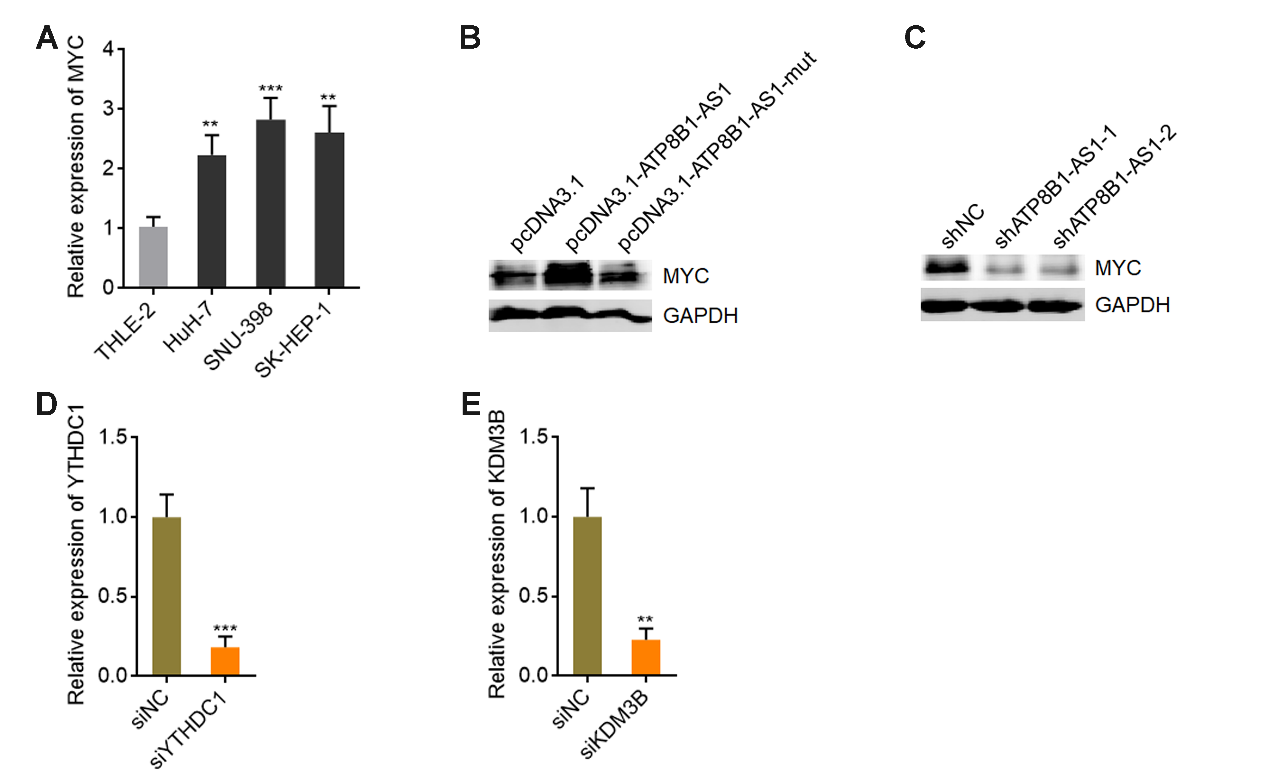


**Figure S3.** ATP8B1-AS1 upregulates *MYC* expression in an m6A dependent manner. **(A)** MYC expression in immortalized liver cell line THLE-2 and HCC cell lines HuH-7, SNU-398, and SK-HEP-1 was detected by qPCR. **(B)** MYC protein levels in SNU-398 cells with wild-type or m6A-modified 792 site mutated ATP8B1-AS1 overexpression were measured by western blot. **(C)** MYC protein levels in SNU-398 cells with ATP8B1-AS1 depletion were measured by western blot. **(D)** YTHDC1 expression in SNU-398 cells with YTHDC1 silencing was detected by qPCR. **(E)** KDM3B expression in SNU-398 cells with KDM3B silencing was detected by qPCR. Results are presented as mean ± SD based on three independent experiments. ***P* < 0.01, ****P* < 0.001 by one-way ANOVA followed by Dunnett's multiple comparisons test (**A**) or two-tailed unpaired t test (**D**, **E**).
